# Supplementary material
Source: MDPI journal article supplement (https://www.mdpi.com/2571-9408/7/5/115)

## Supporting Informations

### Cadmium Yellow Pigments in Oil Paintings: Optical Degradation Studies Utilizing 3D Fluorescence Mapping Supported by Raman Spectroscopy and Colorimetry

Francesca Assunta Pisu<sup>1</sup>, Carlo Maria Carbonaro<sup>1</sup>, Carlo Ricci<sup>1</sup>, Stefania Porcu<sup>1,\*</sup>, and Daniele Chiriu<sup>1</sup>

<sup>1</sup>Dept. of Physics University of Cagliari – Cittadella Universitaria SP n°8 09042 Monserrato (CA) – Italy

\*Correspondence: stefania.porcu@dsf.unica.it

Figure S1. PL of pure C and S pigments

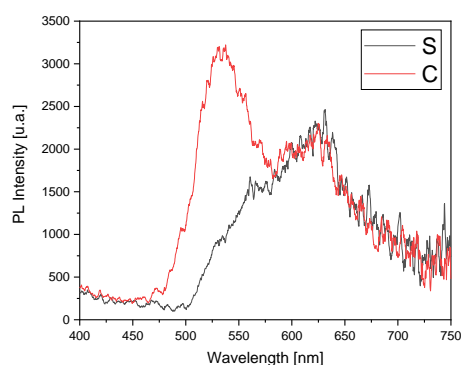

Figure S2. PLE of Fresh Oli, C-O and S-O samples. Degradation vs Time trough irradiation at 250 and 365 nm.

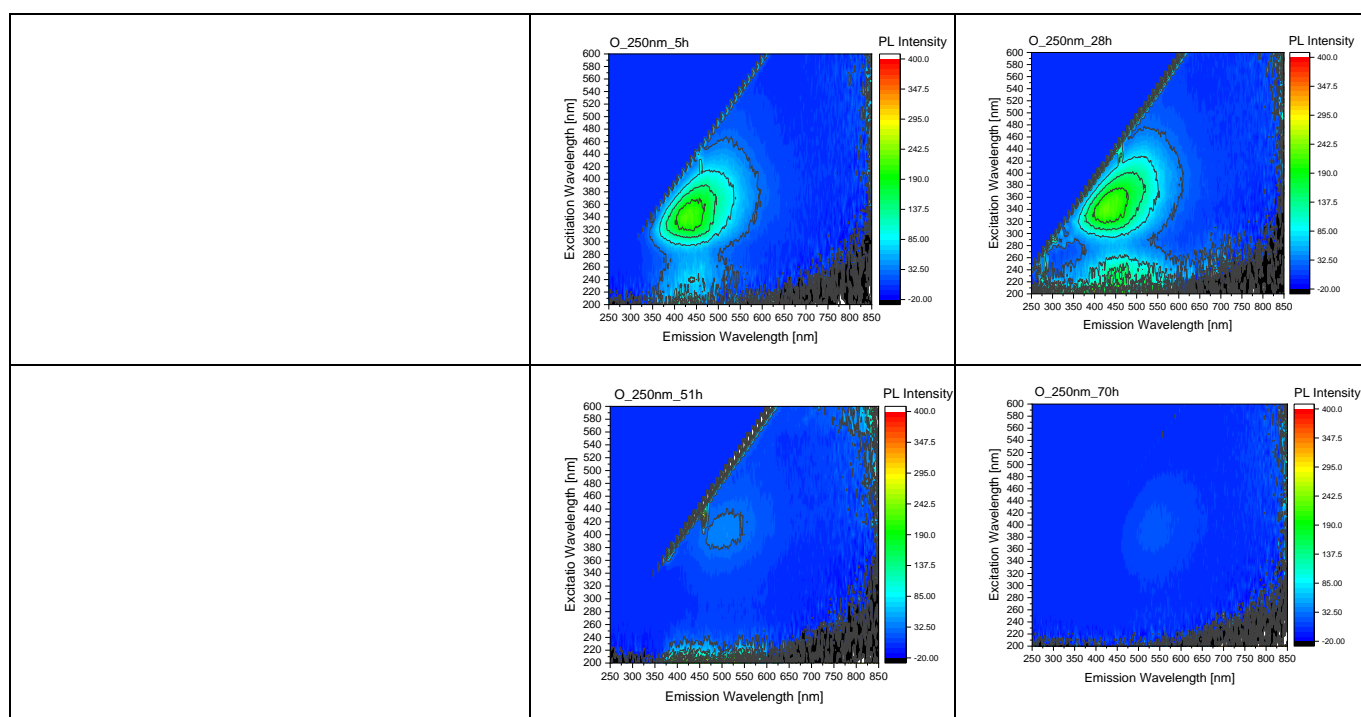

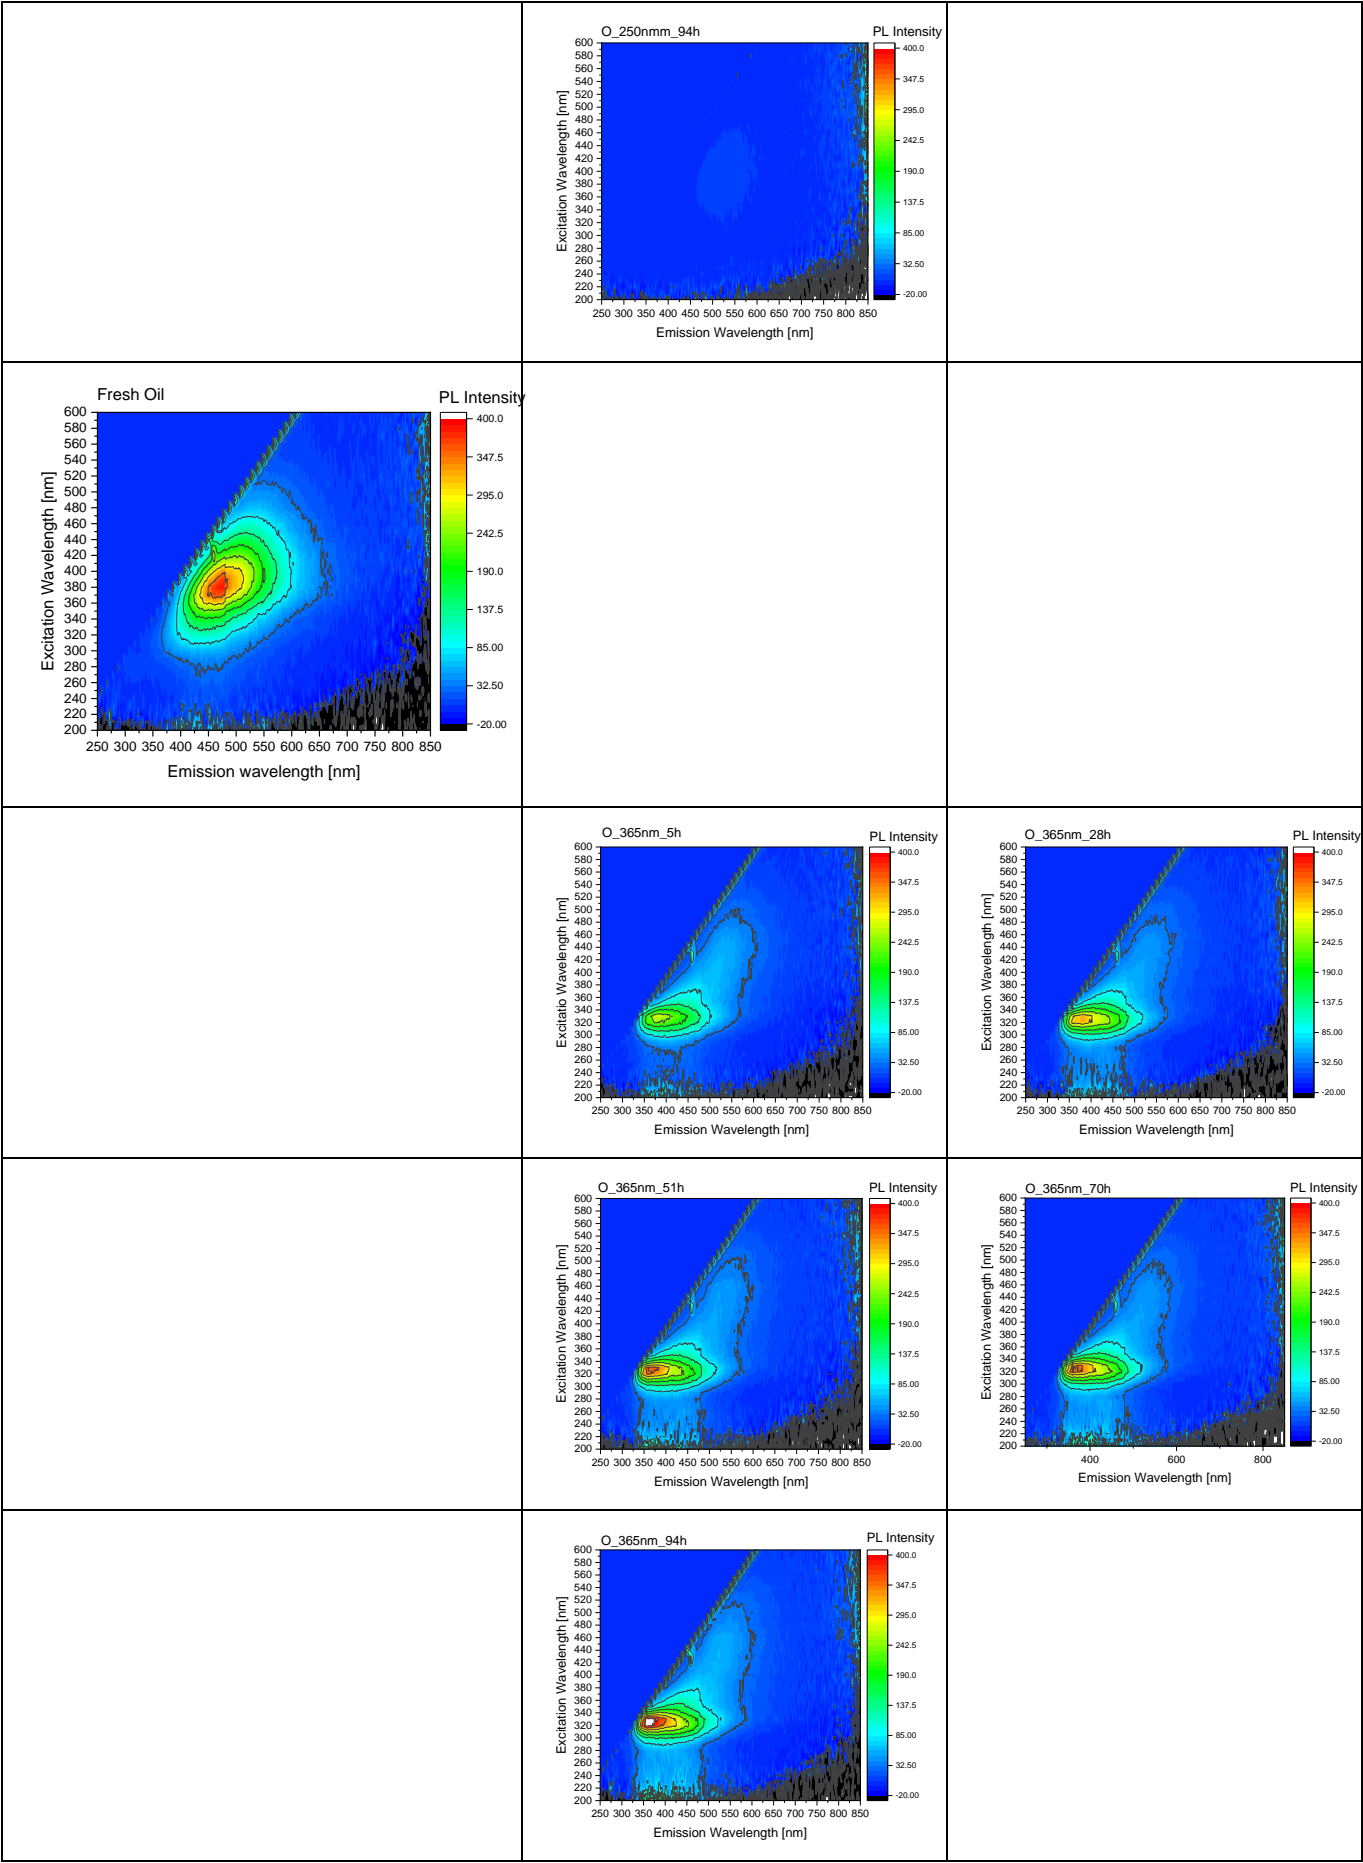

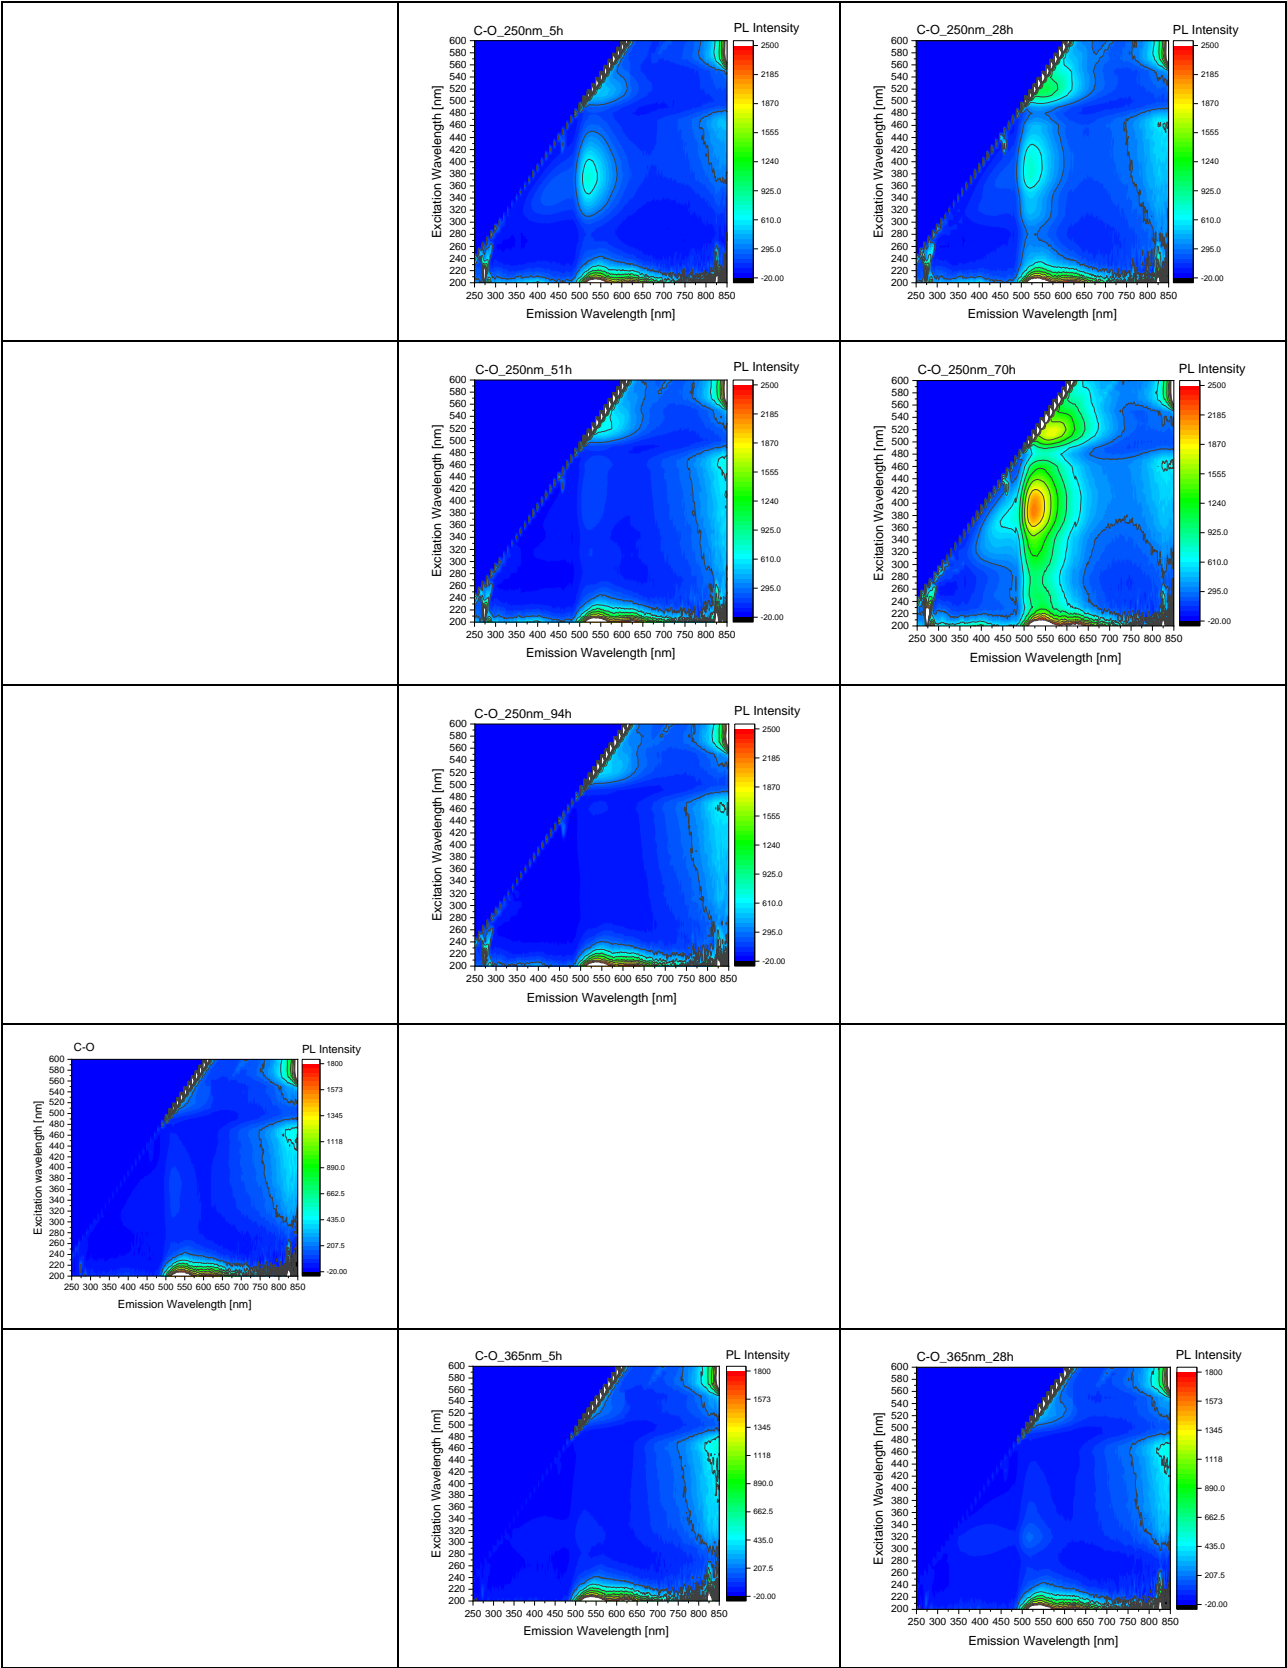

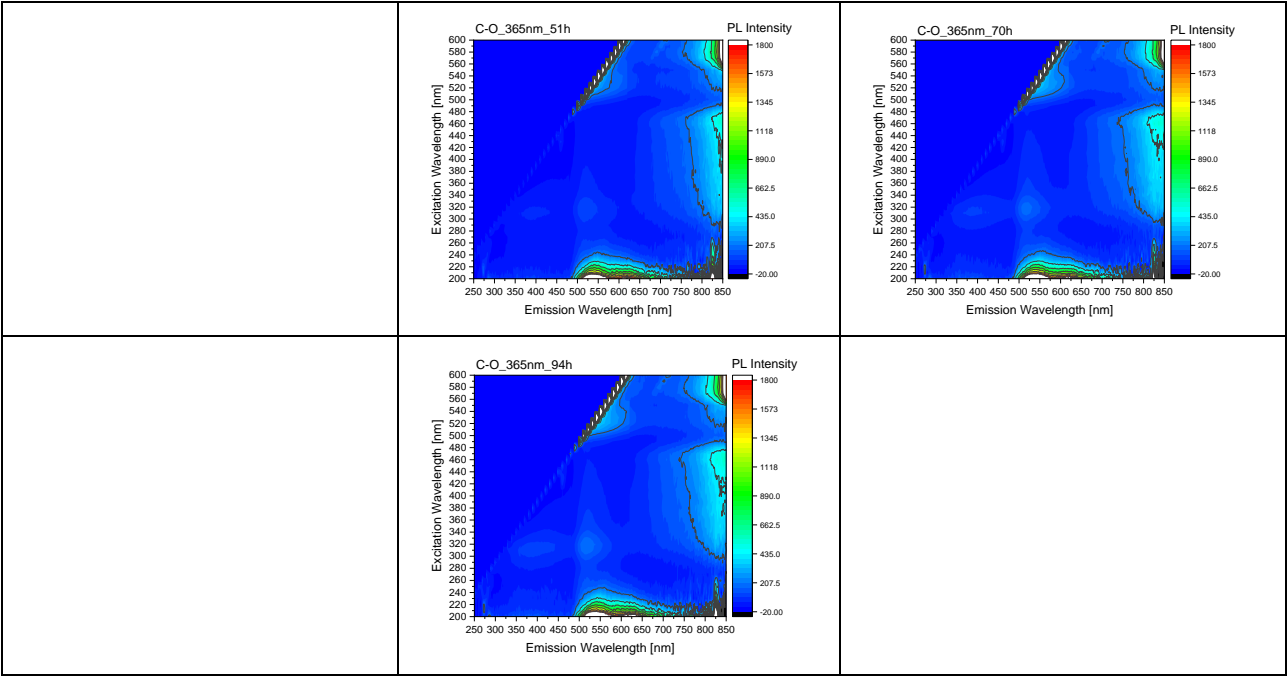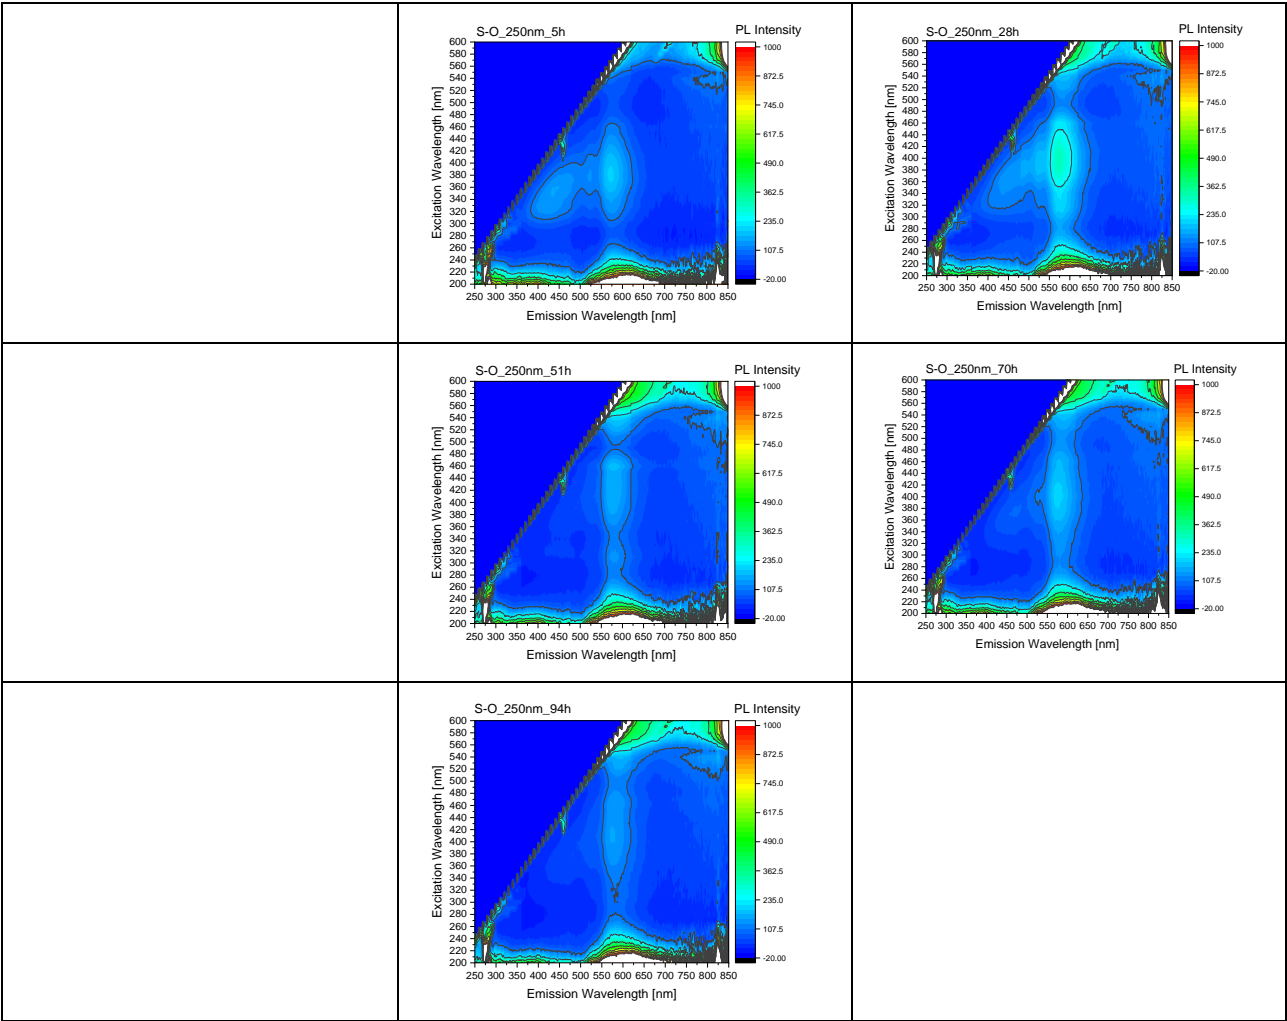



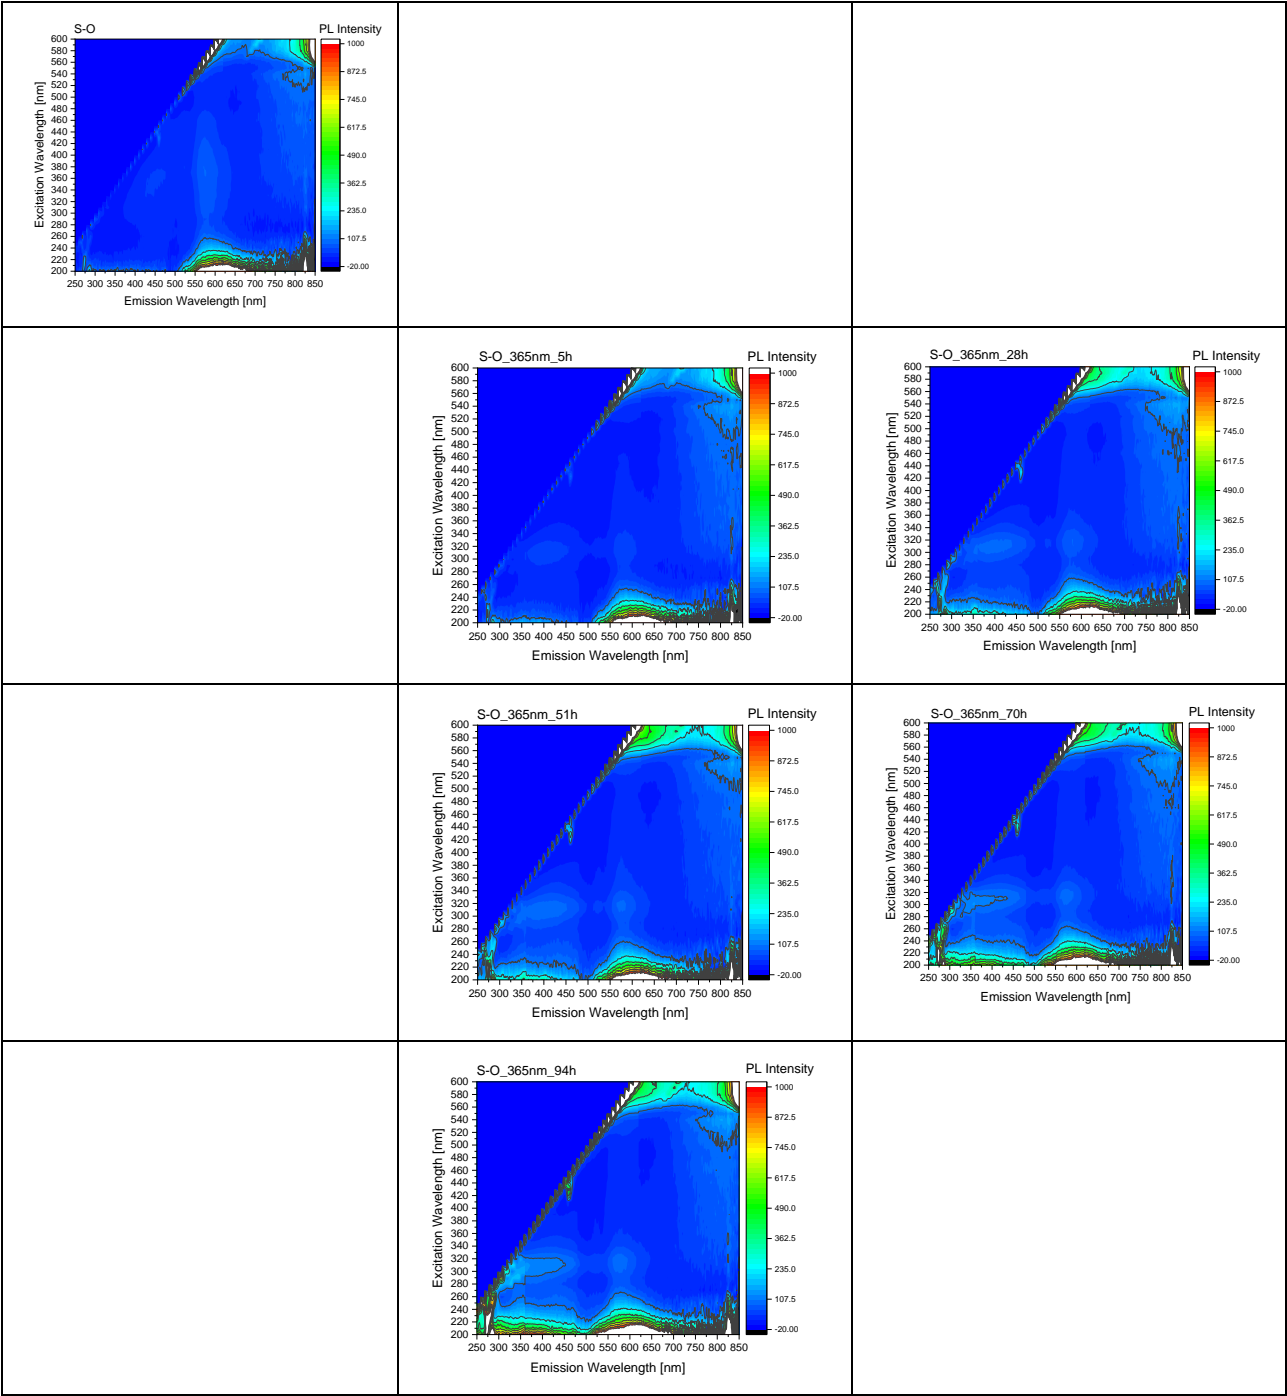

Supplement: s1 [file s1]
